# Supplementary material for: Targeted Assessment of G0S2 Methylation Identifies a Rapidly Recurrent, Routinely Fatal Molecular Subtype of Adrenocortical Carcinoma
Source: Oxford University Press journal article supplement (doi:10.1158/1078-0432.ccr-18-2693), 2019-02-15
Supplement: 10780432ccr182693-sup-207258_2_supp_5313576_pm6dh1.xlsx [file 10780432ccr182693-sup-207258_2_supp_5313576_pm6dh1.xlsx]

## Sheet: ACC
CLINICAL DATA																	MOLECULAR DATA
Tumor ID	Institution	Sex	Age at diagnosis	Sample site	ENSAT stage at diagnosis	Grade	Weiss	Hormone	Weight (g)	Largest diameter (cm)	Resection	Recurrence	Death	Metastasis	Time to last followup (mo)	Time to recurrence (mo)	BUB1B	SEM	PINK1	SEM	G0S2	SEM	GUSB	SEM	BUB1B-GUSB	PINK1-GUSB	BUB1B-PINK1	G0S2-GUSB	EpiTect - G0S2 (% Unmethylated)	EpiTect - G0S2 (% Methylated)	Bisulfite Seq. - G0S2 (Ave. % Methylated)	G0S2 Methylation Status
ACC 1	FMUSP	F	31.6003	Adrenal	4	2	8	5	1270	16	3	x	1	1	14.4667	x	28.0845	0.0221611	27.0271	0.0411176	30.2523	0.138519	28.3489	0.0299777	-0.264351	-1.32173	1.05738	1.90341	0.499715	0.500285	0.466204	1
ACC 2	FMUSP	M	37.5743	Adrenal	3	1	6	11	x	12	0	1	0	1	15.2115	11.3018	31.1908	0.14614	27.9187	0.0456662	28.5077	0.0185118	28.445	0.0518838	2.74575	-0.526358	3.2721	0.0626558	0.997685	0.00231485	0.00567596	0
ACC 3	FMUSP	F	33.1253	Adrenal	2	1	6	1	240	20	0	1	0	1	56.5092	26.0534	28.1783	0.0683758	27.8728	0.0126124	26.7113	0.0909807	27.6669	0.0480678	0.511448	0.20591	0.305538	-0.95561	0.981224	0.0187761	0.034145	0
ACC 4	FMUSP	M	66.4367	Adrenal	3	1	8	1	x	19	0	1	1	1	19.0226	17.4127	28.6969	0.00341974	29.4652	0.147864	31.9537	0.0428919	29.3568	0.0531636	-0.659949	0.108363	-0.768312	2.5969	0.846046	0.153954	0.323012	1
ACC 5	FMUSP	F	29.7112	Adrenal	2	1	3	5	x	15	0	0	0	0	131.187	131.187	34.6915	0.276185	29.0139	0.0358068	32.062	0.0133066	29.2752	0.232513	5.41628	-0.261347	5.67763	2.78674	0.999465	0.000534914	0.0157188	0
ACC 6	FMUSP	F	15.3758	Adrenal	4	2	7	5	1475	20	3	x	1	1	21.5195	x	28.5471	0.0119503	28.7855	0.00917217	32.5272	0.0345869	28.5191	0.0311462	0.0280177	0.266434	-0.238417	4.0082	0.997966	0.00203427	0.0142914	0
ACC 7	FMUSP	F	22.8501	Adrenal	2	1	8	1	282	14.5	4	1	1	1	23.0637	3.58111	27.1201	0.071292	29.2315	0.0300611	34.0578	0.0971353	28.9627	0.0132032	-1.84266	0.268765	-2.11142	5.09506	0.0625744	0.937426	0.951868	1
ACC 8	FMUSP	F	32.9336	Adrenal	1	1	3	1	50.5	4.7	0	0	0	0	21.1253	21.1253	32.1373	0.0529572	27.7883	0.013254	30.6645	0.0424131	29.4466	0.0721409	2.69072	-1.65829	4.34901	1.21785	0.997432	0.00256791	0.00624607	0
ACC 9	FMUSP	M	30.6064	Adrenal	3	1	6	0	330	11	2	x	1	1	11.729	4	29.9475	0.126169	26.5467	0.275824	27.2995	0.0618756	28.5597	0.024709	1.38781	-2.013	3.40081	-1.26017	0.998152	0.00184755	0.0363073	0
ACC 10	FMUSP	M	54.141	Adrenal	3	1	3	1	351.8	8.5	0	0	0	0	69.2238	69.2238	35.169	0.105407	27.1994	0.0450824	27.0773	0.0840001	29.9598	0.0335121	5.20921	-2.76042	7.96962	-2.88257	0.994722	0.00527777	0.0183868	0
ACC 11	FMUSP	F	23.1321	Adrenal	3	1	5	5	38	6	0	1	0	1	115.088	6.73511	32.448	0.0562114	27.7405	0.0494527	34.0087	0.0597186	27.1508	0.103344	5.29716	0.58965	4.70751	6.85793	0.164924	0.835076	0.451123	1
ACC 12	FMUSP	F	17.7112	Adrenal	4	2	8	5	117	10	3	x	1	1	7.45791	x	28.7535	0.036195	28.4417	0.039453	32.9978	0.272672	28.5318	0.0554041	0.221666	-0.0901127	0.311778	4.46598	0.15791	0.84209	0.93093	1
ACC 13	FMUSP	F	53.399	Adrenal after neoadj. EDP+M	4	1	7	5	312.3	11.3	3	x	1	1	12.2875	x	30.064	0.0636429	27.6422	0.0251403	28.5425	0.0436995	28.8713	0.0842133	1.19267	-1.22905	2.42172	-0.328816	0.994353	0.00564668	0.0378864	0
ACC 14	FMUSP	F	52.8761	Recurrence (Adrenal)	2	1	4	1	x	9.5	0	1	0	1	70.768	13.9959	29.5713	0.0374626	28.1627	0.0542274	34.2433	0.105193	28.6904	0.0494791	0.88091	-0.527627	1.40854	5.55291	0.236561	0.763439	0.636671	1
ACC 15	FMUSP	M	53.9466	Adrenal	1	1	3	1	15	4.5	0	0	0	0	89.5277	89.5277	35.3187	0.0892997	27.3694	0.0270759	29.0442	0.0475298	28.1172	0.0386927	7.20152	-0.74781	7.94933	0.92698	0.991821	0.0081792	0.0186115	0
ACC 16	FMUSP	F	60.8679	Adrenal	1	1	4	0	x	2.5	0	0	0	0	15.7372	15.7372	31.1068	0.00723463	27.0806	0.0389279	27.9402	0.0623978	29.8972	0.0321822	1.20959	-2.81664	4.02622	-1.95705	0.997172	0.00282809	0.0096391	0
ACC 17	FMUSP	M	38.9131	Adrenal	3	2	7	5	x	14.5	1	x	1	1	20.4025	2.79261	28.5507	0.0606122	27.0645	0.0535577	30.7076	0.0506981	28.8374	0.0493967	-0.286718	-1.77295	1.48623	1.87012	0.998685	0.00131479	0.00617277	0
ACC 18	FMUSP	F	44.1369	Adrenal	4	1	8	2	810	18	3	x	1	1	54.078	x	30.8859	0.0434095	27.794	0.0591158	29.4659	0.00415885	27.1771	0.0490784	3.70888	0.616985	3.09189	2.28888	0.999096	0.000904496	0.0138423	0
ACC 19	FMUSP	F	61.692	Adrenal	4	2	9	5	1677	18.4	3	x	1	1	9.95483	x	29.068	0.0447763	27.0817	0.0777636	32.0822	0.0575257	27.0446	0.0428662	2.02339	0.0371272	1.98627	5.0376	0.999685	0.000314751	0.0163779	0
ACC 20	FMUSP	F	40.4271	Adrenal	4	2	5	5	380	14	3	x	1	1	1.70842	x	28.5181	0.0588206	28.7272	0.018435	34.0097	0.027524	28.1244	0.034558	0.39374	0.602835	-0.209095	5.88536	0.0731199	0.92688	0.933476	1
ACC 21	FMUSP	F	62.8008	Adrenal	3	2	7	5	x	13	1	x	1	1	15.4086	4.23819	30.485	0.012605	28.0293	0.0357888	33.4674	0.0549756	27.5652	0.0443816	2.9198	0.464144	2.45565	5.90223	0.997577	0.00242329	0.101419	0
ACC 22	FMUSP	M	30.5407	Adrenal	2	2	7	5	758.4	14.5	0	1	1	1	16.5914	2.20123	29.2749	0.0290111	28.4266	0.0505789	32.8006	0.0953503	27.124	0.0263601	2.15085	1.30258	0.848269	5.67656	0.248193	0.751807	0.712523	1
ACC 23	FMUSP	M	25.6701	Adrenal	4	1	8	1	x	19	3	x	1	1	6.11088	x	29.1725	0.0251927	27.6184	0.016341	33.8925	0.126814	30.1771	0.023908	-1.00462	-2.55868	1.55407	3.71541	0.230061	0.769939	0.894911	1
ACC 24	FMUSP	M	61.2594	Adrenal	3	2	8	5	148.5	15.7	0	1	0	1	30.883	7.58932	31.0239	0.0605553	29.8016	0.0164372	26.4007	0.0744534	28.6301	0.0185114	2.39374	1.17151	1.22223	-2.22945	0.996435	0.00356461	0.00633471	0
ACC 25	FMUSP	M	53.514	Adrenal	3	1	9	1	1713	17	1	x	1	1	10.2505	9.46201	29.138	0.0622727	29.6203	0.0356651	27.6605	0.0328272	28.7766	0.0146443	0.361361	0.84362	-0.482259	-1.11617	0.995877	0.00412305	0.0167767	0
ACC 26	FMUSP	M	83.1869	Adrenal	3	1	8	8	x	12	1	x	1	x	0.62423	x	32.2173	0.174241	28.8386	0.0272695	29.1323	0.131055	29.3186	0.0339862	2.89865	-0.480061	3.37871	-0.186354	0.998192	0.00180779	0.0252447	0
ACC 27	FMUSP	M	36.5	Metastasis	x	x	3 or greater	x	x	x	4	x	x	1	x	x	31.5506	0.0541098	28.5098	0.0449857	28.5255	0.0366495	29.6604	0.0783095	1.89021	-1.15059	3.0408	-1.13495	0.998057	0.00194335	0.0464172	0
ACC 28	FMUSP	M	65.6482	Adrenal	4	1	6	5	x	13.5	3	x	1	1	9.88912	x	31.0961	0.0955658	27.5963	0.0478141	28.7611	0.0190716	29.6845	0.0454239	1.41156	-2.08824	3.4998	-0.923394	0.998528	0.00147172	0.0233815	0
ACC 29	FMUSP	F	35.0116	Adrenal	2	1	7	0	538.8	12.2	0	1	0	1	28.9117	21.2238	30.0386	0.107818	28.2011	0.012001	26.7765	0.016421	27.7154	0.0143971	2.32323	0.485672	1.83756	-0.93896	0.997778	0.00222245	0.0277796	0
ACC 30	FMUSP	F	43.8029	Adrenal	1	1	3	5	x	4	0	0	0	0	27.4333	27.4333	32.4949	0.0259218	27.0508	0.0358104	29.227	0.0720878	29.5444	0.0465863	2.95049	-2.4936	5.4441	-0.317402	0.993141	0.00685884	0.0085991	0
ACC 31	FMUSP	F	23.2197	Adrenal	4	2	6	5	555	14	3	x	1	1	17	x	28.6057	0.241636	28.3498	0.0217232	28.7917	0.00902601	28.782	0.00486682	-0.176294	-0.432231	0.255938	0.00969442	0.322153	0.677847	0.764319	1
ACC 32	FMUSP	M	29	Adrenal	4	1	8	1	665	19	3	x	1	1	3.9	x	30.6425	0.0176807	28.4558	0.0453092	35.139	0.130728	29.1363	0.06712	1.50617	-0.680569	2.18674	6.00268	0.155578	0.844422	0.801199	1
ACC 33	FMUSP	F	29	Adrenal	4	1	6	5	550	12	3	x	1	1	28.3203	x	32.9367	0.123217	28.3622	0.0126375	27.4124	0.0431597	28.5774	0.0619466	4.35931	-0.215237	4.57454	-1.16507	0.995791	0.00420851	0.0412413	0
ACC 34	FMUSP	F	37.7	Recurrence (Adrenal)	2	2	5	5	x	6	0	1	1	1	34	6.63	28.1481	0.189058	29.7424	0.072886	31.9639	0.0389995	27.9082	0.0349914	0.239916	1.83418	-1.59426	4.05568	0.130516	0.869484	0.3208	1
ACC 35	FMUSP	F	55.5921	Adrenal	3	2	8	1	176	10.5	1	x	1	1	35.6797	7.95072	30.0603	0.0389226	29.2381	0.067356	32.8794	0.11131	27.2694	0.105141	2.7909	1.96867	0.822224	5.60997	0.124062	0.875938	0.928126	1
ACC 36	FMUSP	F	30.9076	Adrenal	3	1	7	5	310	12	1	x	1	1	16.9856	9.92197	29.5932	0.143799	28.3953	0.0811554	34.0514	0.116795	26.2891	0.0798384	3.30412	2.1062	1.19792	7.76236	0.121362	0.878638	0.924125	1
ACC 37	FMUSP	M	17.6646	Adrenal	3	2	8	11	165	9	4	0	0	0	66	66	31.8744	0.111977	26.2044	0.0146826	25.7717	0.0601836	28.9653	0.000813064	2.90907	-2.76094	5.67	-3.19364	0.99497	0.00502971	0.00317385	0
ACC 38	FMUSP	F	22.3819	Adrenal	2	1	6	0	316	11	0	1	0	1	84.3039	28.386	31.2938	0.127739	27.1299	0.0370781	33.6681	0.173787	29.0713	0.0975689	2.22253	-1.94138	4.16391	4.59681	0.226542	0.773458	0.646079	1
ACC 39	FMUSP	M	33	Adrenal	4	x	5	0	x	x	3	x	0	1	16	x	29.5259	0.0053745	27.3982	0.043103	34.2481	0.028705	26.9498	0.0669334	2.57618	0.448497	2.12769	7.29836	0.118273	0.881727	0.892587	1
ACC 40	FMUSP	F	66.2341	Adrenal	2	1	4	0	55	6	0	0	0	0	155.532	155.532	33.0057	0.0358561	27.9357	0.0350183	28.1246	0.030601	29.4512	0.0198539	3.55452	-1.51549	5.07001	-1.3266	0.997503	0.00249701	0.0117321	0
ACC 41	FMUSP	F	65.4346	Adrenal	2	1	4	5	x	7	0	0	0	0	14.3901	14.3901	31.7489	0.0814025	27.5489	0.0449398	26.223	0.0302931	29.6854	0.0206908	2.06355	-2.1365	4.20005	-3.46239	0.996986	0.00301385	0.0173029	0
ACC 42	FMUSP	F	37.4155	Adrenal	2	1	3	2	31.9	6	0	0	0	0	113.873	113.873	33.6696	0.0554224	27.5642	0.0522296	29.777	0.0676062	29.1112	0.0213022	4.5584	-1.54699	6.10538	0.665829	0.999723	0.000276596	0.012246	0
ACC 43	FMUSP	F	36.5	Adrenal	2	x	3 or greater	5	2600	12	4	1	1	1	12.3667	5	x	x	x	x	x	x	x	x	x	x	x	x	0.105402	0.894598	x	1
ACC 44	FMUSP	F	35	Adrenal	2	1	6	5	320	10	4	1	1	1	21	14	x	x	x	x	x	x	x	x	x	x	x	x	0.336645	0.663355	0.448841	1
ACC 45	FMUSP	F	17	Adrenal	3	1	4	2	825	15	0	0	0	0	125.467	125.467	x	x	x	x	x	x	x	x	x	x	x	x	0.995843	0.00415689	0.00174034	0
ACC 46	FMUSP	F	18	Adrenal	3	2	8	5	1000	13	4	1	1	1	19	8	x	x	x	x	x	x	x	x	x	x	x	x	0.994795	0.00520525	0.00705604	0
ACC 47	UM	M	48.1752	Adrenal	2	1	3 or greater	0	110	7.9	0	1	0	1	142.127	29.0103	31.4848	0.157503	28.2777	0.158164	27.6132	0.149861	29.9049	0.0218662	1.57995	-1.6272	3.20715	-2.29172	0.208632	0.791368	x	1
ACC 48	UM	F	47.6304	Adrenal	2	2	3 or greater	2	x	16	0	1	1	1	50.8912	20.0411	29.8534	0.0273412	27.3942	0.115294	33.5635	0.101818	27.6981	0.0168772	2.15529	-0.303886	2.45918	5.86541	0.129933	0.870067	x	1
ACC 49	UM	F	47.5893	Adrenal	2	1	3 or greater	0	77	6	0	1	1	1	36.3039	16.4271	29.4505	0.0633074	27.8045	0.106727	29.3826	0.06541	29.4988	0.068245	-0.0483081	-1.69427	1.64596	-0.116213	0.994127	0.00587283	0.0119966	0
ACC 50	UM	M	47.948	Adrenal	2	2	3 or greater	1	200	8.6	0	0	0	0	116.107	116.107	28.2382	0.0965841	27.0607	0.0661463	28.4579	0.0873216	28.2948	0.481447	-0.0566235	-1.23408	1.17745	0.16313	0.998515	0.00148538	0.0262728	0
ACC 51	UM	F	35.9452	Adrenal	4	x	3 or greater	5	x	x	3	x	1	1	14.7844	x	30.0417	0.0951981	27.1887	0.0544027	26.6923	0.0119966	28.1014	0.144248	1.94034	-0.912671	2.85301	-1.40903	0.99236	0.00763967	0.0206069	0
ACC 52	UM	F	39.666	Adrenal	4	x	3 or greater	1	x	x	3	x	1	1	1.08419	x	27.7771	0.143358	28.3867	0.0343	30.6165	0.0356919	27.4818	0.0236742	0.295362	0.904958	-0.609596	3.13474	0.971756	0.0282441	0.0401728	0
ACC 53	UM	M	55.0856	Adrenal	2	1	3 or greater	1	35	5.5	4	0	0	0	0.229979	0.229979	29.9736	0.0155009	28.6013	0.180499	29.4045	0.0634138	29.7679	0.0160841	0.205778	-1.16659	1.37236	-0.363308	0.978967	0.0210329	0.00708866	0
ACC 54	UM	M	45.4593	Adrenal	1	1	3 or greater	0	x	5	0	0	0	0	183.195	183.195	31.6753	0.0737583	27.2665	0.0656465	26.3288	0.110183	28.5593	0.0352657	3.11593	-1.29286	4.4088	-2.23058	0.994492	0.00550838	0.0172014	0
ACC 55	UM	F	60.679	Adrenal	4	2	3 or greater	1	1805	25	3	x	1	1	4.36961	x	31.0101	0.0201405	31.1116	0.0539827	30.0616	0.0853383	29.0808	0.0924394	1.92936	2.0308	-0.101443	0.980774	0.0092838	0.990716	x	1
ACC 56	UM	F	61.8645	Adrenal	2	2	3 or greater	1	253	9.8	0	1	1	1	11.3018	2.06982	30.2848	0.0828941	28.7902	0.0941698	31.6424	0.0695065	27.528	0.0740624	2.75675	1.26213	1.49461	4.11441	0.00231219	0.997688	x	1
ACC 57	UM	F	49.5414	Adrenal	2	x	3 or greater	10	397	8.7	0	1	1	1	20.7639	6.86653	26.6913	0.0526285	27.4409	0.178707	30.538	0.0437644	26.6584	0.0295438	0.0329138	0.78252	-0.749606	3.87953	0.977456	0.0225436	x	0
ACC 58	UM	M	34.4531	Adrenal	2	2	3 or greater	0	226	9.2	0	1	1	1	9.26489	5.05955	28.5918	0.0531998	28.8397	0.0310415	27.8309	0.0381191	28.5005	0.0332011	0.091308	0.339251	-0.247943	-0.669588	0.463685	0.536315	x	1
ACC 59	UM	F	47.2991	Liver or retrocaval mass	2	x	3 or greater	5	x	x	4	1	0	1	176.92	23.1951	30.0374	0.15794	27.695	0.0249157	28.6917	0.0285187	28.0464	0.0307256	1.99101	-0.351395	2.3424	0.64531	0.51224	0.48776	x	1
ACC 60	UM	M	60.8296	Adrenal	2	1	3 or greater	0	370	8.5	0	0	0	0	67.9097	67.9097	30.2798	0.0574781	26.7724	0.0523667	27.0239	0.0720462	28.4735	0.101835	1.80629	-1.70104	3.50733	-1.44961	0.998963	0.00103731	0.00298304	0
ACC 61	UM	F	50.7844	Metastasis (Peritoneal)	2	2	3 or greater	5	167	9.5	0	1	0	1	160.493	13.7002	29.8888	0.0509916	27.1194	0.0431367	27.8818	0.0784301	24.7381	0.0481854	5.15067	2.38127	2.7694	3.14373	0.998153	0.00184721	0.00383805	0
ACC 62	UM	M	83.2717	Adrenal	2	1	3 or greater	0	74	6	0	0	0	0	4.40246	4.40246	31.3706	0.111201	27.1625	0.0436215	30.9139	0.0719885	27.8668	0.0384649	3.50377	-0.704332	4.20811	3.04708	0.0945543	0.905446	0.515071	1
ACC 63	UM	F	47.2991	Retroperitoneal soft tissue	2	x	3 or greater	5	x	x	4	1	0	1	176.92	23.1951	29.1045	0.0427173	27.3769	0.160494	28.6046	0.0102234	27.3112	0.0680794	1.79323	0.0656738	1.72756	1.29339	0.995747	0.00425317	0.00758591	0
ACC 64	UM	F	68.7365	Retrocaval mass	2	1	3 or greater	2	41	5.5	0	1	0	1	54.3737	14.8501	29.4191	0.124709	26.8211	0.0469471	29.827	0.0831723	27.9113	0.120277	1.50777	-1.0902	2.59797	1.9157	0.992611	0.00738867	0.00239971	0
ACC 65	UM	F	68.7365	Liver	2	1	3 or greater	2	41	5.5	0	1	0	1	54.3737	14.8501	30.0442	0.0877537	26.9883	0.039697	30.2007	0.054658	27.3108	0.0407805	2.73345	-0.322454	3.05591	2.8899	0.998604	0.00139608	0.00820657	0
ACC 66	UM	F	69.0075	Adrenal	4	2	3 or greater	5	x	17.1	3	x	1	1	17.6427	x	27.7183	0.056784	28.273	0.0794981	30.7122	0.0355916	28.568	0.0766843	-0.849747	-0.295049	-0.554698	2.14411	0.0634322	0.936568	0.93349	1
ACC 67	UM	M	60.0986	Adrenal	4	2	3 or greater	1	50	5	3	x	0	1	50.7598	x	29.4782	0.109979	26.2973	0.0436296	26.9458	0.0433598	28.0402	0.0774119	1.43796	-1.74291	3.18087	-1.09434	0.999483	0.000516788	0.0860659	0
ACC 68	UM	M	51.2361	Adrenal	4	1	3 or greater	0	x	10.9	3	x	0	1	38.0123	x	30.6301	0.00825581	25.8665	0.0696251	25.8483	0.0144336	26.4705	0.0262584	4.15954	-0.604062	4.7636	-0.622284	0.999835	0.000165336	0.0171998	0
ACC 69	UM	M	19.7618	Adrenal	3	2	3 or greater	1	x	10.5	1	x	1	1	7.3922	2.85832	30.5081	0.0724416	31.0951	0.106073	32.8543	0.03592	29.0892	0.0288757	1.41892	2.00596	-0.587041	3.76517	0.00997358	0.990026	0.924779	1
ACC 70	UM	F	51.2772	Adrenal	3	x	3 or greater	5	x	8	1	x	1	1	9.56057	3.84394	29.5715	0.0393681	27.4473	0.0540854	33.0344	0.253331	27.5609	0.015905	2.01066	-0.11359	2.12425	5.47356	x	x	x	1
ACC 71	UM	M	53.0459	Adrenal	2	1	3 or greater	0	x	16	0	0	0	0	146.793	146.793	30.2446	0.0679256	27.1679	0.136298	25.5484	0.030752	28.2246	0.0310604	2.02008	-1.05665	3.07673	-2.67618	x	x	x	0
ACC 72	UM	F	48.7748	Adrenal	2	1	3 or greater	0	185	7.6	0	0	0	0	104.312	104.312	32.5102	0.266566	28.7601	0.114571	27.5378	0.0252423	29.6706	0.0840206	2.83954	-0.910579	3.75012	-2.13285	x	x	x	0
ACC 73	UM	F	56.5941	Adrenal	2	x	3 or greater	0	x	18	1	x	1	1	22.8337	13.1745	26.4511	0.0509181	30.4095	0.0678261	29.1957	0.0227979	28.8202	0.0296627	-2.36913	1.58926	-3.95839	0.375502	x	x	x	0
ACC 74	UM	F	42.9897	Adrenal	2	2	3 or greater	5	257.6	11.2	0	0	0	0	114.037	114.037	29.0355	0.0390801	27.6098	0.0700242	27.0691	0.0782479	28.139	0.0958605	0.896514	-0.529226	1.42574	-1.06989	x	x	x	0
ACC 75	UM	F	52.052	Adrenal	2	1	3 or greater	0	2890	19	0	0	1	0	33.347	7.98357	29.7152	0.0900631	26.8761	0.0929362	26.6162	0.0073909	29.0496	0.0268964	0.665621	-2.17354	2.83916	-2.43338	x	x	x	0
ACC 76	UM	M	42.7242	Adrenal	4	x	3 or greater	2	x	16	3	x	1	1	6.2423	x	27.4723	0.0441355	29.5212	0.0483902	24.6757	0.0338172	27.6924	0.0722443	-0.220085	1.82888	-2.04896	-3.01662	x	x	x	0
ACC 77	UM	M	38.2286	Adrenal	2	1	3 or greater	0	160	8	0	0	0	0	116.928	116.928	30.5828	0.122478	27.4075	0.290117	26.5996	0.0406394	28.2032	0.0536767	2.37953	-0.795778	3.17531	-1.60362	x	x	x	0
ACC 78	UM	F	31.7399	Adrenal	2	x	3 or greater	1	x	x	4	1	0	1	106.415	11.1376	27.9409	0.0457381	26.5758	0.114859	31.0153	0.0748273	27.0623	0.037301	0.878572	-0.486533	1.36511	3.95294	x	x	x	1
ACC 79	UM	F	51.4196	Adrenal	4	2	3 or greater	5	1305	15.5	3	x	1	1	26.809	x	31.4159	0.136883	28.3812	0.0871453	30.7104	0.0530428	29.6241	0.0161968	1.79174	-1.24297	3.03471	1.08627	x	x	x	0
ACC 80	UM	F	45.2895	Adrenal	2	x	3 or greater	2	x	x	0	0	1	0	19.1211	12.1561	27.8114	0.0414772	27.8942	0.0300288	29.7527	0.0605431	27.7703	0.0855153	0.0411097	0.123947	-0.0828374	1.98245	0.277579	0.722421	0.826555	1
ACC 81	UM	M	77.2594	Adrenal	4	1	3 or greater	1	1050	18	3	x	1	1	19.2854	x	30.9709	0.0437468	28.5545	0.192491	29.9128	0.0890066	28.002	0.0282024	2.96889	0.552527	2.41637	1.91079	0.538443	0.461557	x	1
ACC 82	UM	M	55.6304	Adrenal	2	x	3 or greater	0	1125	17	0	0	0	0	110.949	110.949	31.3565	0.112303	26.7239	0.0552732	28.7736	0.131	28.4346	0.102402	2.92191	-1.71063	4.63254	0.339069	0.997161	0.00283889	x	0
ACC 83	UM	F	64.2875	Adrenal	3	1	3 or greater	0	1060	15.5	2	x	0	0	69.5852	69.5852	31.118	0.0547335	27.2559	0.0395862	27.9479	0.0927537	29.0183	0.0568238	2.09969	-1.76235	3.86204	-1.0704	0.99749	0.00251002	x	0
ACC 84	UM	F	33.6482	Adrenal	3	1	3 or greater	1	225	9	0	0	0	0	33.4784	33.4784	27.6724	0.0198784	28.1658	0.0483734	31.5502	0.226309	29.1617	0.0644436	-1.48931	-0.995886	-0.493423	2.38852	0.0797669	0.920233	0.916123	1
ACC 85	UM	M	23.2444	Adrenal	4	2	3 or greater	1	1500	19.5	3	x	1	1	5.74949	x	28.3898	0.0425533	27.8585	0.0511462	28.8068	0.102921	27.1434	0.0213344	1.24642	0.715081	0.531343	1.66346	0.998899	0.00110053	0.00557916	0
ACC 86	UM	M	50.3819	Adrenal	3	1	3 or greater	0	445	11	0	0	0	0	31.2115	31.2115	31.8868	0.0969913	27.9845	0.0623584	27.7235	0.0161859	28.3802	0.0510509	3.5066	-0.395688	3.90228	-0.656704	0.998219	0.0017806	0.106432	0
ACC 87	UM	F	69.5414	Adrenal	3	1	3 or greater	9	105	6	0	1	0	1	65.4127	18.6283	29.6091	0.0390803	28.6327	0.0281059	32.5383	0.050275	29.4544	0.0252213	0.154776	-0.821706	0.976481	3.08394	0.0530629	0.946937	0.951459	1
ACC 88	UM	F	65.1444	Adrenal	2	1	3 or greater	1	480	11.5	0	0	0	0	70.5051	70.5051	31.3025	0.10063	26.5907	0.101598	26.6991	0.0249261	28.1628	0.0446033	3.13975	-1.57204	4.7118	-1.46369	0.997029	0.002971	0.0100919	0
ACC 89	UM	F	23.7317	Metastasis (Peritoneal)	3	2	3 or greater	1	252	12.5	1	x	1	1	36.3039	13.7659	28.0106	0.0144619	28.7654	0.0579414	32.8153	0.122009	28.0853	0.0566156	-0.0747426	0.680094	-0.754836	4.72998	7.03266e-05	0.99993	0.966122	1
ACC 90	UM	F	59.9781	Adrenal	3	2	3 or greater	5	447	14.5	0	1	1	1	16.3614	3.54825	28.8747	0.274763	28.1458	0.0345831	32.504	0.0338644	27.3601	0.0272956	1.51465	0.785691	0.728963	5.14386	0.000476574	0.999523	0.94322	1
ACC 91	UM	M	80.3559	Metastasis (Retroperitoneal)	3	1	3 or greater	0	x	10.5	0	1	1	1	42.4148	20.501	29.0466	0.0507419	28.0044	0.019828	27.5273	0.0327321	27.1711	0.0399368	1.87546	0.833254	1.04221	0.356147	0.997626	0.00237392	0.0198787	0
ACC 92	UM	F	30.1136	Lymph node	4	2	3 or greater	5	x	x	3	x	1	1	0.722793	x	26.878	0.0421122	27.8206	0.0349201	28.9044	0.0804537	27.4237	0.0478532	-0.545617	0.396902	-0.942519	1.4807	0.999137	0.000863098	0.0156573	0

## Sheet: ACA
CLINICAL DATA								MOLECULAR DATA
Tumor ID	Institution	Sex	Age at diagnosis	Sample site	Weiss	Hormone	Largest diameter (cm)	BUB1B	SEM	PINK1	SEM	G0S2	SEM	GUSB	SEM	BUB1B-GUSB	PINK1-GUSB	BUB1B-PINK1	G0S2-GUSB	EpiTect - G0S2 (% Unmethylated)	EpiTect - G0S2 (% Methylated)	Bisulfite Seq. - G0S2 (Ave. % Methylated)	G0S2 Methylation Status
ACA 1	FMUSP	F	40.2767	Adrenal	2	1	3.9	34.4557	0.172423	27.1851	0.0283874	28.5947	0.0371713	29.2772	0.0236965	5.17848	-2.09213	7.27061	-0.68246	0.997999	0.00200138	0.00850896	0
ACA 2	FMUSP	F	26.3973	Adrenal	0	1	3	35.1434	0.276109	27.6094	0.0990063	28.9672	0.033988	29.6772	0.0418364	5.46612	-2.06788	7.53399	-0.710044	0.997559	0.00244065	0.00747375	0
ACA 3	FMUSP	F	70.1644	Adrenal	0	1	3.5	34.0689	0.140347	27.2191	0.0446437	28.0836	0.0234865	29.7656	0.032133	4.30325	-2.54655	6.84979	-1.68204	0.997493	0.002507	0.0380836	0
ACA 4	FMUSP	F	79.4767	Adrenal	1	1	11	32.567	0.0637369	27.5421	0.0120844	27.8717	0.0720158	29.4982	0.0587585	3.06876	-1.95613	5.02489	-1.6265	0.971978	0.0280219	0.130934	0
ACA 5	FMUSP	F	34.3918	Adrenal	1	1	3	x	x	x	x	x	x	x	x	x	x	x	x	0.997092	0.0029081	0.0176995	0
ACA 6	FMUSP	F	70.1288	Adrenal	0	1	4	34.2142	0.0622391	27.2188	0.133679	28.2149	0.0360425	29.5562	0.0903633	4.65797	-2.33746	6.99543	-1.34133	0.998417	0.00158252	0.0117777	0
ACA 7	FMUSP	F	19.2575	Adrenal	0	1	3	34.3958	0.16634	28.1145	0.0331636	27.574	0.0409087	29.2866	0.049428	5.10915	-1.17211	6.28126	-1.71261	0.99843	0.00157027	0.00821666	0
ACA 8	FMUSP	F	40.0795	Adrenal	0	1	3.1	35.3553	0.236919	27.6946	0.213618	28.8646	0.0126948	29.8613	0.0774736	5.49404	-2.16664	7.66068	-0.996703	0.998212	0.00178782	0.0290085	0
ACA 9	FMUSP	F	64.9589	Adrenal	0	1	7.5	34.0013	0.0267612	27.4687	0.0343026	27.6558	0.0892557	29.441	0.190175	4.56028	-1.97234	6.53262	-1.78517	0.999342	0.000658352	0.0116926	0
ACA 10	FMUSP	F	30.9452	Adrenal	1	1	3	35.6094	0.032512	27.1463	0.0354901	28.807	0.23182	30.1538	0.0960822	5.45558	-3.00755	8.46313	-1.34682	0.986349	0.0136506	0.00987212	0
ACA 11	FMUSP	F	21.537	Adrenal	0	1	1.5	34.1956	0.215665	27.9578	0.0137716	29.5048	0.0331448	28.7783	0.0536248	5.41726	-0.820454	6.23771	0.726486	0.999357	0.000643106	0.0074589	0
ACA 12	FMUSP	F	29.9726	Adrenal	0	1	2.5	35.8034	0.114614	28.4291	0.0164223	31.3761	0.104926	30.9302	0.0113762	4.87324	-2.50107	7.37431	0.44591	0.997539	0.00246111	0.0493568	0
ACA 13	FMUSP	F	56.8356	Adrenal	1	1	1.9	35.1625	0.0816735	28.1594	0.0292505	29.5402	0.0396833	30.2291	0.0172471	4.93341	-2.06967	7.00309	-0.688905	0.996645	0.00335482	0.0252678	0
ACA 14	FMUSP	F	39	Adrenal	1	1	2.5	33.4074	0.188085	27.0041	0.0530492	26.0811	0.0417036	29.0149	0.0666316	4.39246	-2.01079	6.40325	-2.93383	0.991541	0.00845896	0.0152925	0
ACA 15	UM	F	46	Adrenal	2 or less	3	x	x	x	x	x	x	x	x	x	x	x	x	x	x	x	0.00102257	0
ACA 16	UM	F	30	Adrenal	2 or less	3	x	x	x	x	x	x	x	x	x	x	x	x	x	x	x	0.00134004	0
ACA 17	UM	M	55	Adrenal	2 or less	3	x	x	x	x	x	x	x	x	x	x	x	x	x	x	x	0.015552	0
ACA 18	UM	F	63	Adrenal	2 or less	3	x	x	x	x	x	x	x	x	x	x	x	x	x	x	x	0.043745	0
ACA 19	UM	F	70	Adrenal	2 or less	1	x	x	x	x	x	x	x	x	x	x	x	x	x	x	x	0.00191685	0
ACA 20	UM	F	42	Adrenal	2 or less	1	x	x	x	x	x	x	x	x	x	x	x	x	x	x	x	0.00430363	0
ACA 21	UM	F	62	Adrenal	2 or less	1	x	x	x	x	x	x	x	x	x	x	x	x	x	x	x	0.0045056	0
ACA 22	UM	F	57	Adrenal	2 or less	1	x	x	x	x	x	x	x	x	x	x	x	x	x	x	x	0.00635105	0

## Sheet: legend
	Field	Value
	All fields	x = data not available OR not applicable
	Institution	FMUSP = sample is from Faculdade de Medicina da Universidade de São Paulo (University of São Paulo Medical School), São Paulo, SP, Brazil
		UM = sample is from Michigan Endocrine Oncology Repository, University of Michigan, Ann Arbor, MI, USA
	Grade	1 = low grade (< 20 mitoses/50 HPF), 2 = high grade (> 20 mitoses/50 HPF)
	History of hormone excess	0 = Hormonally silent (non-functional)
		1 = Cortisol
		2 = Androgen
		3 = Mineralocorticoid
		4 = Estradiol
		5 = Cortisol + Androgen
		6 = Mineralocorticoid + Estradiol
		7 = Mineralocorticoid + Androgen
		8 = Cortisol + Estradiol
		9 = Cortisol + Mineralocorticoid
		10 = Cortisol + Androgen + Mineralocorticoid
		11 = Cortisol + Androgen + Estradiol
	Resection	0 = R0
		1 = R1
		2 = R2
		3 = no attempt at curative surgery
		4 = RX
	Recurrence	0 = No recurrence to date
		1 = History of recurrence
	Death	0 = Patient alive at last followup
		1 = Patient deceased
	Metastasis	0 = No history of metastasis to date
		1 = History of metastasis
	BUB1B, PINK1, G0S2, GUSB	Mean Ct of 3 replicates/gene/sample recorded for corresponding gene listed in field
	SEM	Standard error of the mean Ct
	G0S2 Methylation Status	0 = EpiTect indicates G0S2 locus is unmethylated OR G0S2 expression high enough to suspect G0S2 unmethylated in absence of DNA
		1 = EpiTect indicates G0S2 locus is methylated OR G0S2 expression low enough to suspect G0S2 methylated in absence of DNA
